# Supplementary material
Source: PubMed Central journal article supplement (PMC9427683)
Supplement: NIHMS1801577-supplement-supinfo.pdf [file NIHMS1801577-supplement-supinfo.pdf]

## Supplemental Information

Defective fractalkine-CX3CR1 signaling aggravates neuroinflammation and affects recovery from cuprizone-induced demyelination

Andrew S. Mendiola<sup>1,2,#,\*</sup>, Kaira A. Church<sup>1,#</sup>, Sandra M. Cardona<sup>1,3</sup>, Difernando Vanegas<sup>1</sup>, Shannon A. Garcia<sup>1</sup>, Wendy Macklin<sup>4</sup>, Sergio A. Lira<sup>5</sup>, Richard M. Ransohoff<sup>6</sup>, Erzsebet Kokovay<sup>7,8</sup>, Chin-Hsing Annie Lin<sup>9</sup> and Astrid E. Cardona<sup>1,3,\*</sup>

<sup>1</sup>Department of Molecular Microbiology & Immunology, The University of Texas at San Antonio, San Antonio, TX 78249, USA.

<sup>2</sup>Current address: Gladstone Institutes, San Francisco, California, 94158, USA.

<sup>3</sup>South Texas Center for Emerging Infectious Diseases, The University of Texas at San Antonio, San Antonio, TX 78249, USA.

<sup>4</sup>Department of Cell and Developmental Biology, University of Colorado School of Medicine, Aurora, CO 80045, USA.

<sup>5</sup>Precision Immunology Institute Icahn School of Medicine at Mount Sinai, New York, NY 10029, USA.

<sup>6</sup>Third Rock Ventures, Boston, MA 02116, USA.

<sup>7</sup>Cell Systems and Anatomy, UT-Health Science Center San Antonio, San Antonio TX 78229, USA.

<sup>8</sup>Barshop Institute of Longevity and Aging Studies, San Antonio, TX 78245, USA.

<sup>9</sup>Department of Integrative Biology, The University of Texas at San Antonio, San Antonio, TX 78249, USA.

# Contributed equally to this work.

## Supplementary Figure 1

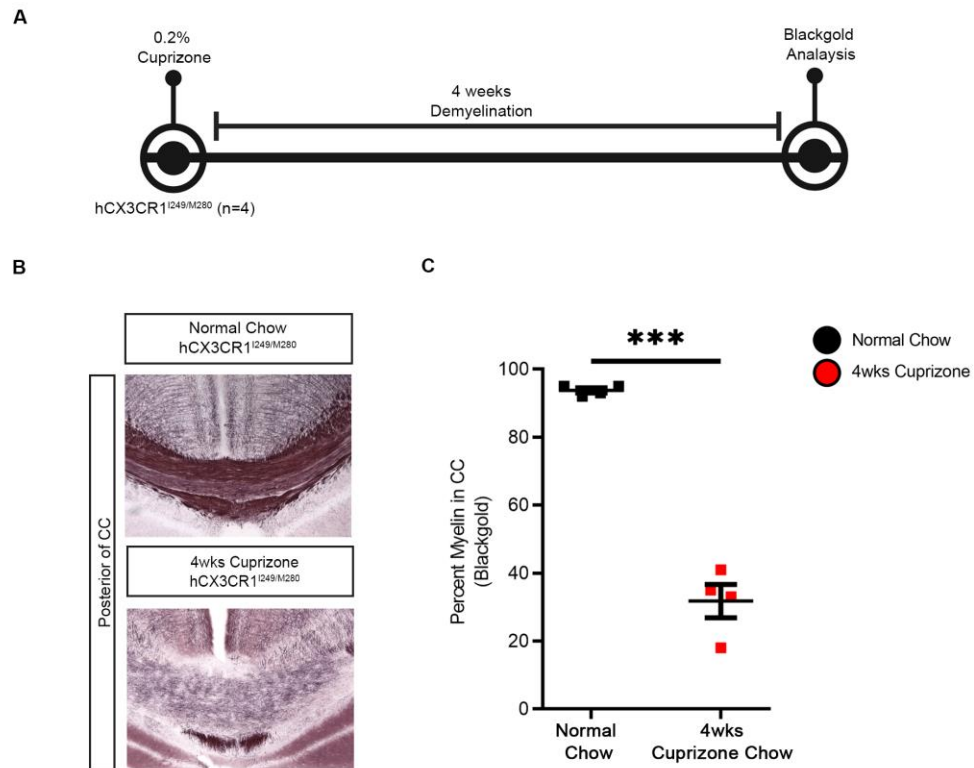

**Supplementary Figure 1. Histological analysis of myelin in  $hCX3CR1^{I249/M280}$  mice. A,** Experimental design for 4 wks cuprizone-induced demyelination and downstream analyses in  $hCX3CR1^{I249/M280}$  mice. **B,** Representative images of brain sections from  $hCX3CR1^{I249/M280}$  mice fed normal chow or cuprizone, stained for Blackgold. **C,** Image quantification of myelin staining in the posterior of the corpus callosum as shown in **B**. Data are mean  $\pm$  SEM for  $n = 4$  per group, each dot represents an individual mouse. \*\*\* $<0.001$  using Mann-Whitney two-tailed t-test.

## Supplementary Figure 2

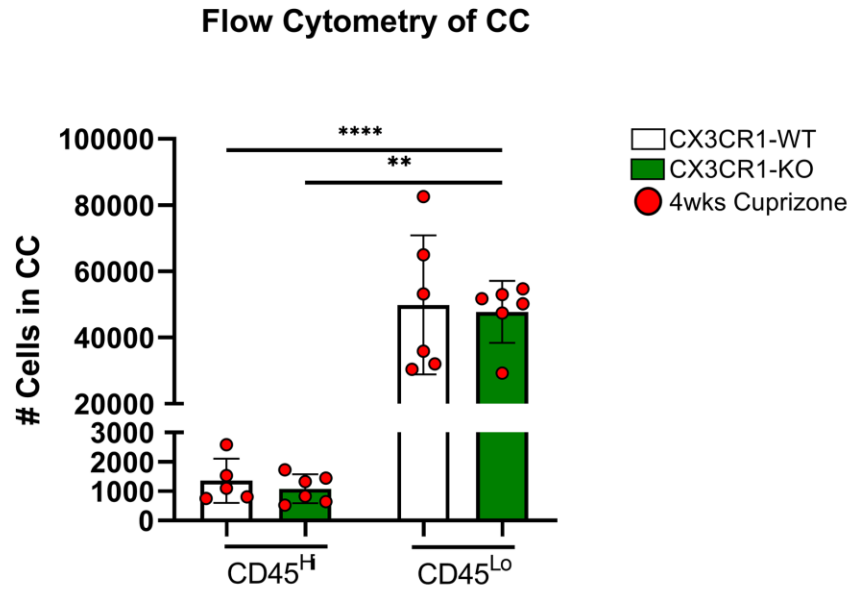

**Supplementary Figure 2. Flow cytometric analysis of resident and infiltrating myeloid cells following acute cuprizone.** Flow cytometric analysis showing cell numbers of CD45<sup>hi</sup>CD11b<sup>+</sup> (infiltrating) and CD45<sup>lo</sup>CD11b<sup>+</sup> (resident) cells from corpus callosum of CX3CR1-WT and CX3CR1-KO mice fed cuprizone. Data are mean ± SEM for  $n = 5-6$  mice per group, each dot represents an individual mouse. \*\*\*\* $<0.001$  by one-way ANOVA followed by Tukey's posttest.

### Supplementary Figure 3

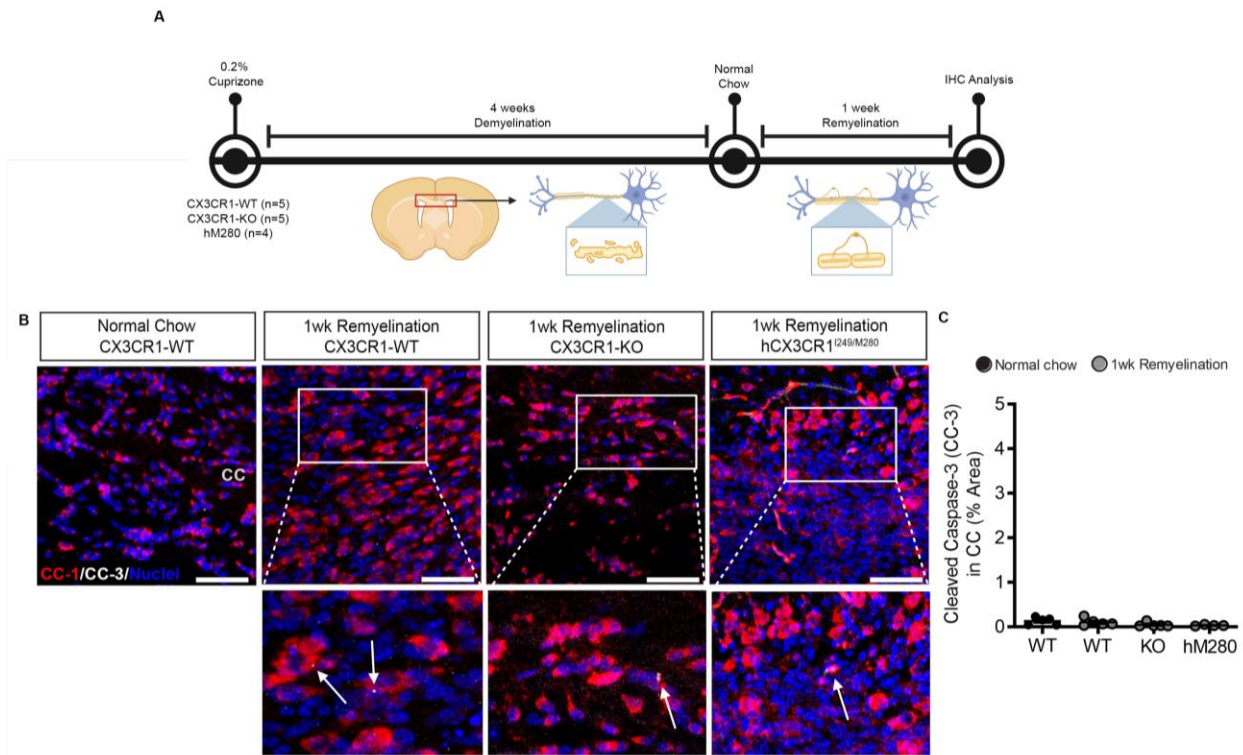

**Supplementary Figure 3. Histological analysis of cell death in mature oligodendrocytes. A,** Experimental design for remyelination studies following cuprizone-induced demyelination. **B,** Representative images of brain sections from CX3CR1-WT, CX3CR1-KO and hCX3CR1<sup>I249/M280</sup> mice following 1wk remyelination (4wks cuprizone + 1 wk normal chow) or fed normal chow immunostained for CC-1 (red) and CC-3 (white). **C,** Image quantification of CC-3 staining in the posterior of the corpus callosum as shown in **B**. Data are mean  $\pm$  SEM for  $n = 4-5$  per group, each dot represents an individual mouse.
